# Supplementary material for: A greener approach toward gadolinium-based contrast agents
Source: Royal Society of Chemistry journal article supplement (doi:10.1039/c4ra00272e), 2014-01-01

## A greener approach toward gadolinium-based contrast agents

Thais P. Gazzzi, Luiz A. Basso, Diógenes S. Santos\* and Pablo Machado\*

*Instituto Nacional de Ciência e Tecnologia em Tuberculose, Centro de Pesquisas em Biologia Molecular e Funcional, Programa de Pós-Graduação em Biologia Celular e Molecular, Pontifícia Universidade Católica do Rio Grande do Sul, 90619-900, Porto Alegre, RS, Brazil*

Phone/Fax: +55 51 3320 3629

E-mail: [diogenes@pucrs.br](mailto:diogenes@pucrs.br) (D.S. Santos); [pablo.machado@pucrs.br](mailto:pablo.machado@pucrs.br) (P. Machado)

### Contents:

1. FTIR and mass spectra of products Gd-DTPA (**2**) and Gd-DOTA (**3**)

FTIR spectrum (UATR) for gadopentate dimeglumine (2)

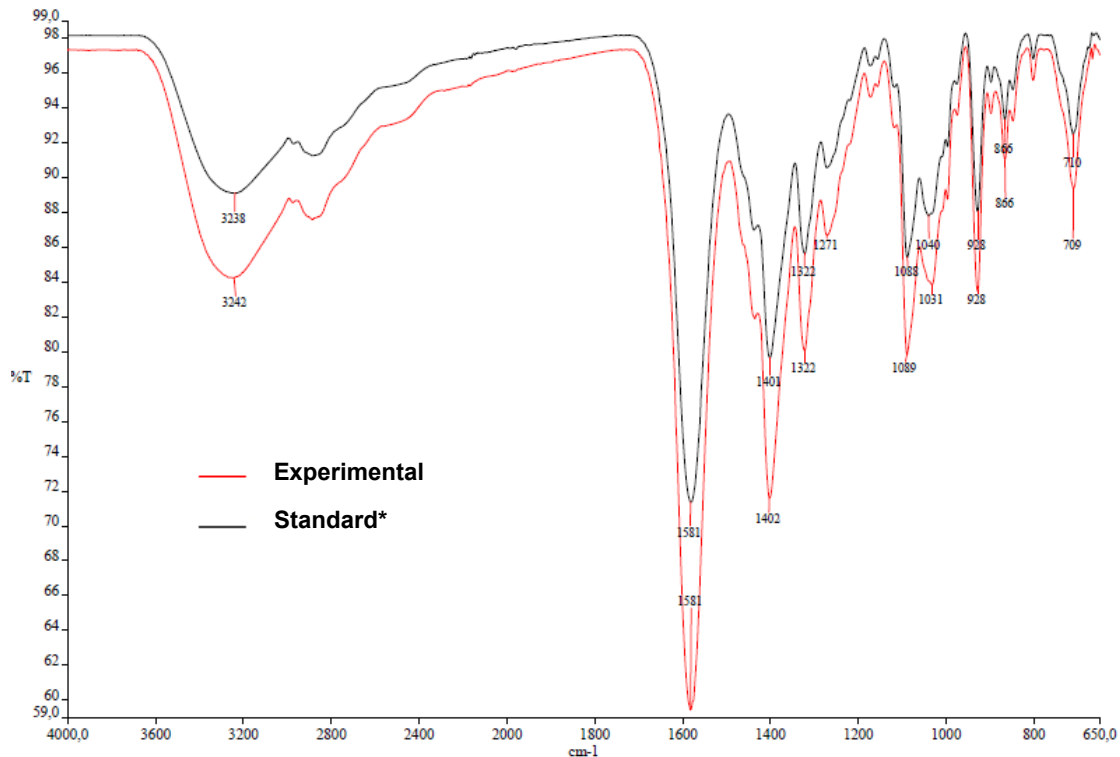

\*Gadopentate de dimeglumine 99.5% pure from Zhejiang Chemline International co., LTD, China.

High-resolution mass spectrum for gadopentate dimeglumine (2)

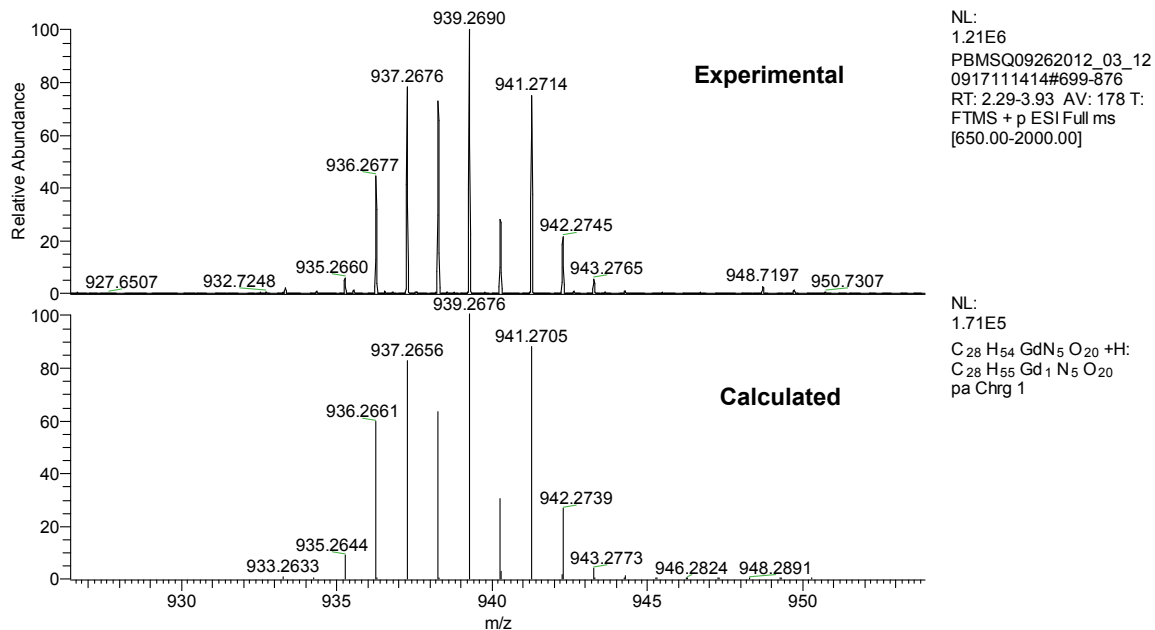

### FTIR spectrum (UATR) for gadoterate meglumine (3)

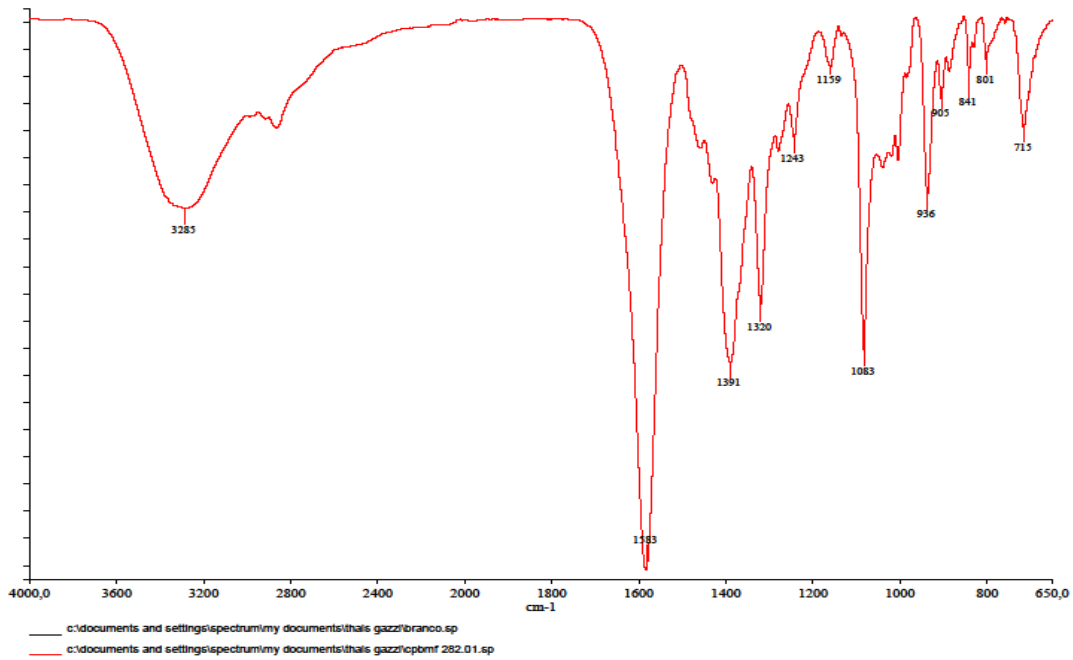

### High-resolution mass spectrum gadoterate meglumine (3)

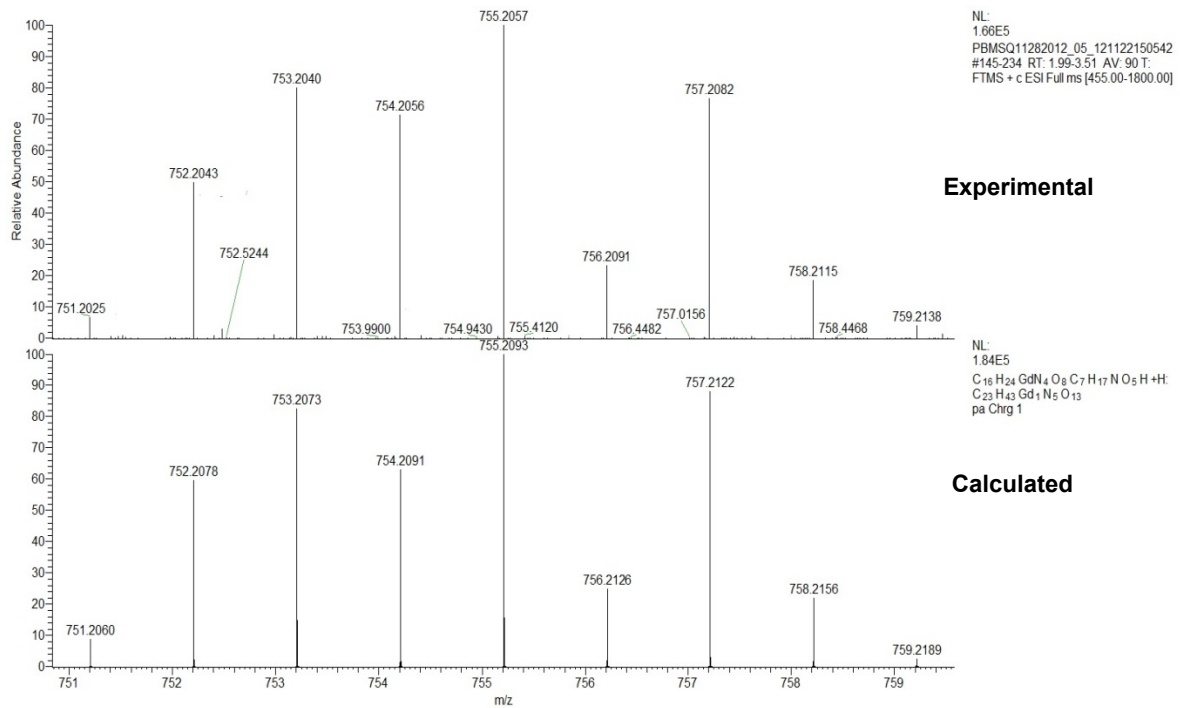

Supplement: c4ra00272e1.pdf [file c4ra00272e1.pdf]
